# Supplementary material for: Phenylboronic Acids Probing Molecular Recognition against Class A and Class C β-lactamases
Source: Antibiotics (Basel). 2019 Sep 30;8(4):171. doi: 10.3390/antibiotics8040171 (PMC6963673; doi:10.3390/antibiotics8040171)
Supplement: Supplementary file 1 [file antibiotics-08-00171-s001.pdf]

# Supplementary Material

## Phenylboronic Acids Probing Molecular Recognition against Class A and class C $\beta$ -lactamases

Pasquale Linciano <sup>1,†</sup>, Mattia Vicario <sup>2,†</sup>, Ivana Kekez <sup>3</sup>, Pierangelo Bellio <sup>4</sup>, Giuseppe Celenza <sup>4</sup>, Isabel Martín-Blecua <sup>5</sup>, Jesús Blázquez <sup>5</sup>, Laura Cendron <sup>2,\*</sup> and Donatella Tondi <sup>1,\*</sup>

<sup>1</sup> Department of Life Sciences, University of Modena and Reggio Emilia, Via Campi 103, Modena 41125, Italy

<sup>2</sup> Department of Biology, University of Padova, Viale G. Colombo 3, Padova 35121, Italy

<sup>3</sup> Department of Chemistry, Faculty of Science, University of Zagreb, Horvatovac 102a, Zagreb 10000, Croatia

<sup>4</sup> Department of Biotechnological and Applied Clinical Sciences, University of L'Aquila, via Vetoio 1, L'Aquila 67100, Italy

<sup>5</sup> National Center of Biotechnology-CSIC, Calle Darwin 3, Madrid 28049, Spain

\* Correspondence: Correspondence: [tondid@unimore.it](mailto:tondid@unimore.it) (D.T.), [laura.cendron@unipd.it](mailto:laura.cendron@unipd.it) (L.C.).

† Equally contributed to the work

**Table 1.** Statistics of data collection, processing and refinement. Values for the outer shell are given in parentheses.

| <i>PaAmpC:3</i>                                     |                                                                                                    |
|-----------------------------------------------------|----------------------------------------------------------------------------------------------------|
| <b>Crystallographic data</b>                        |                                                                                                    |
| Crystal system                                      | Trigonal                                                                                           |
| Space group                                         | <i>P</i> 3 <sub>2</sub> 21                                                                         |
| Wavelength / Å                                      | 0.978                                                                                              |
| Unit cell parameters / Å, °                         | <i>a</i> = <i>b</i> = 82.678, <i>c</i> = 123.563<br><i>α</i> = <i>β</i> = 90.00, <i>γ</i> = 120.00 |
| <i>Z</i>                                            | unit cell                                                                                          |
|                                                     | asymmetric unit                                                                                    |
|                                                     | 6<br>1                                                                                             |
| Resolution range / Å                                | 46.78–1.78<br>(1.81–1.78)                                                                          |
| <i>R</i> <sub>merge</sub>                           | 0.042 (0.567)                                                                                      |
| <i>CC</i> (1/2)                                     | 0.999                                                                                              |
| <i>&lt;I / σ(I)&gt;</i>                             | 12.6 (1.7)                                                                                         |
| Completeness / %                                    | 97.8 (92.0)                                                                                        |
| Redundancy                                          | 3.7 (3.7)                                                                                          |
| <b>Refinement</b>                                   |                                                                                                    |
| <i>R</i> <sub>work</sub> / <i>R</i> <sub>free</sub> | 0.177 / 0.200                                                                                      |
| Protein atoms                                       | 2843                                                                                               |
| Water molecules                                     | 131                                                                                                |
| Ligand atoms                                        | 14                                                                                                 |
| Phosphate ions                                      | 1                                                                                                  |
| Mean <i>B</i> / Å <sup>2</sup>                      | 38.30                                                                                              |
| <b>R.m.s.d. from ideal value</b>                    |                                                                                                    |
| Bond length / Å                                     | 0.012                                                                                              |
| Bond angles / °                                     | 1.548                                                                                              |
| <b>Geometry</b>                                     |                                                                                                    |
| Ramachandran favored / %                            | 97.81                                                                                              |
| Ramachandran outliers / %                           | 0.00                                                                                               |
| Rotamer outliers / %                                | 0.68                                                                                               |

**Table 2.** Hydrogen bonds between ligand molecule **3**, *PaAmpC* residues and water molecules.

| <i>PaAmp</i><br>c | Molecule | No. | Cpd <b>3</b> | Distance (Å) |
|-------------------|----------|-----|--------------|--------------|
| Atom              |          |     | Atom         |              |
| N                 | Ser      | 64  | O14          | 2.88         |
| OH                | Tyr      | 150 | O13          | 2.62         |
| N                 | Ser      | 319 | O14          | 2.86         |
| O                 | W        | 561 | O01          | 2.76         |
| O                 | W        | 502 | O03          | 2.40         |
| O                 | W        | 567 | O13          | 2.76         |
| OG                | Ser      | 64  | B12          | 1.59*        |

\*Denotes a covalent bond.

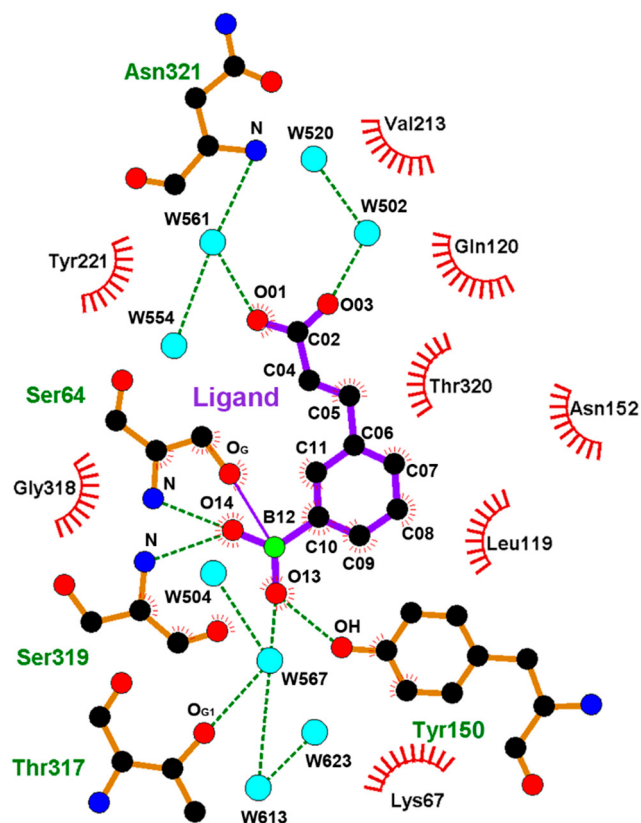

**Figure S1.** Key interactions between AmpC, ligand 3 and water molecules (shown as blue spheres) analyzed by Ligplus software [45]. Atoms identification codes are defined in the li-and binding site plot. Distances between the selected atoms are shown in Table S2.

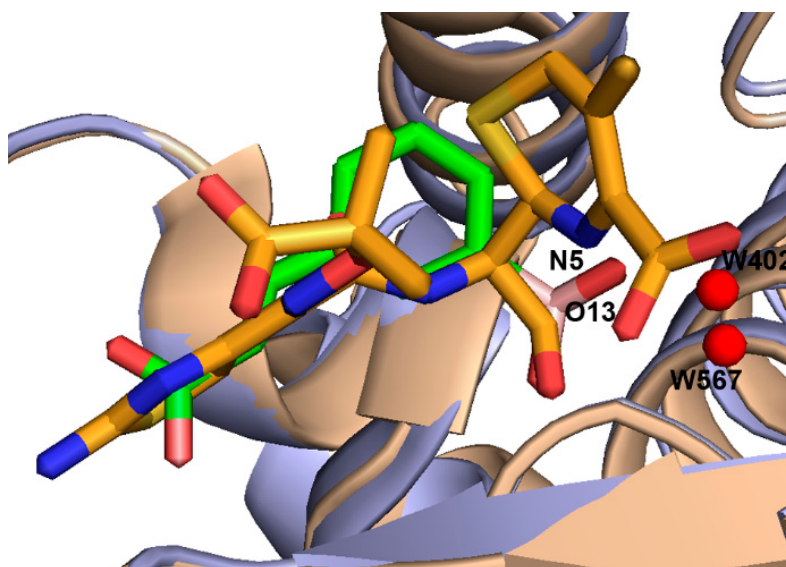

**Figure S2.** Overlay of the *EcAmpC*: **ceftazidime** (wheat) and *PaAmpC*: **3** (light blue) active sites. Ligands (ceftazidime in orange and **3** in green) are represented as sticks. De-acylating water molecules, in *EcAmpC*:**ceftazidime** (W402) and in *PaAmpC*:**3** (W567), are depicted as a red sphere.

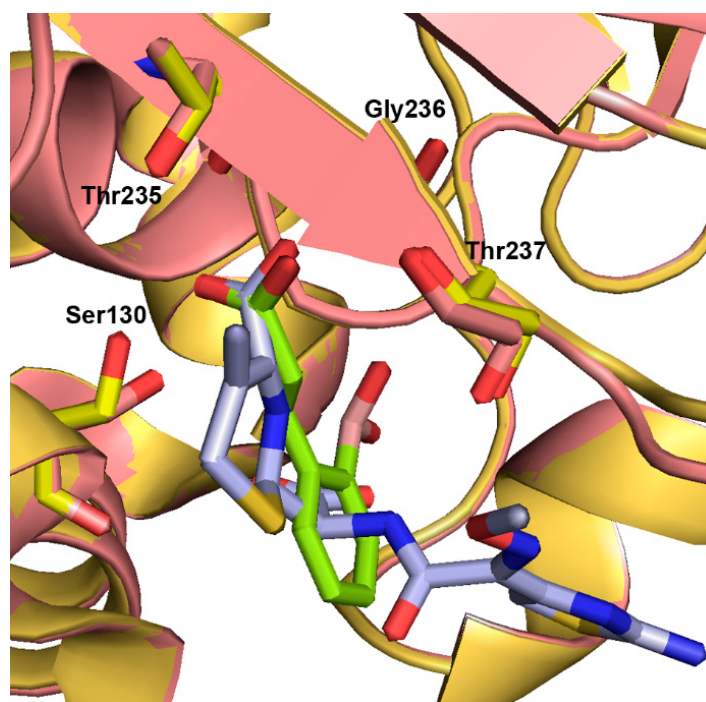

**Figure S3.** Overlay of the KPC-2:**cefotaxime** (salmon) and KPC-2:**2** (ye-low orange) active sites. Ligands (**cefotaxime** in light blue and **2** in lemon) are reported as sticks as well as Ser130, Thr235, Gly236 and Thr237 residues that accommodate the carboxylated side chain in both KPC-2: **ligand** structures.

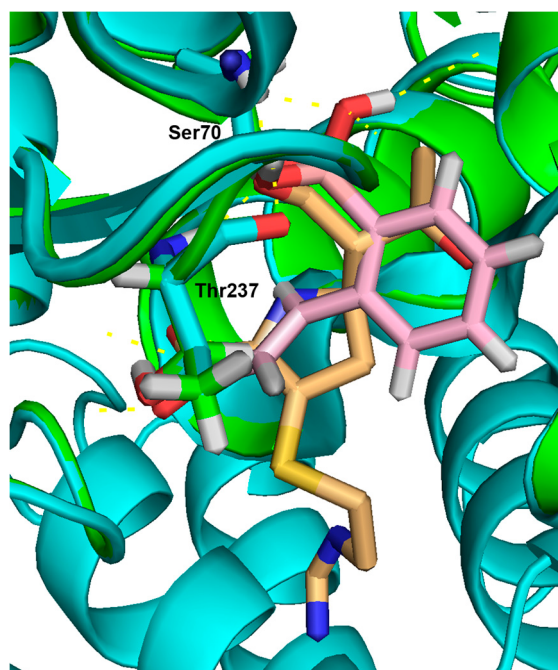

**Figure S4.** Overlay of GES-5: **imipenem** (turquoise) and GES-5:**2** (green) active sites. Ligands (**imipenem** in light orange and **2** in light pink) are reported as sticks, as well as Ser64 and Thr 232 involved in the key interactions for housing the oxanion hole in both GES-5: **ligand** structures.
